# Supplementary material for: Bioequivalence Study Comparing Fixed-Dose Combination of Clopidogrel and Aspirin with Coadministration of Individual Formulations in Chinese Subjects Under Fed Conditions: A Phase I, Open-Label, Randomized, Crossover Study
Source: Springer Nature journal article supplement (doi:10.1007/s12325-020-01486-9), 2020-09-24
Supplement: MOESM1 [file 18412602]

**Supplementary table S1. List of pharmacokinetic parameters and definitions**

| **Parameters** | **Drug/Analyte** | **Matrix** | **Definition/Calculation** |
| --- | --- | --- | --- |
| Cmax | Clopidogrel/SR26334  ASA/SA | Plasma | Maximum plasma concentration observed |
| tmax | Clopidogrel/SR26334  ASA/SA | Plasma | Time to reach Cmax |
| AUClast | Clopidogrel/SR26334  ASA/SA | Plasma | Area under the plasma concentration versus time curve calculated using the trapezoidal method from time zero to the real time, tlast |
| AUC | Clopidogrel/SR26334  ASA/SA | Plasma | Area under the plasma concentration versus time curve extrapolated to infinity according to the following equation:    AUC = AUClast + |
| t1/2z | Clopidogrel/SR26334  ASA/SA | Plasma | Terminal half-life associated with the terminal slope (λz) determined according to the following equation:  T1/2z = 0.693/λz    where λz is the slope of the regression line of the terminal phase of the plasma concentration versus time curve, in semi-logarithmic scale. Half-life is calculated by taking the regression of at least 3 points. |

**Supplementary table S2. Pooled point estimate of treatment ratios and SDw as well as the power of each PK parameter of clopidogrel and acetylsalicylic acid**

|  | **PK parameter** | **Pooled point estimate of ratio (Test vs Ref)** | **SDW (90% CI)** | **True ratio for sample size** | **True SDW for sample size** | **Power** | **Statistical method** |
| --- | --- | --- | --- | --- | --- | --- | --- |
| Clopidogrel | AUClast | 0.99 | 0.344 (0.320; 0.372) | 0.95 | 0.350 | >99% | ABE |
| AUC | 0.98 | 0.335 (0.311; 0.362) | 0.95 | 0.350 | >99% | ABE |
| Cmax | 1.10 | 0.365 (0.340; 0.395) | 1.10 | 0.375 | 94% | ABE |
| Acetylsalicylic acid | AUClast | 1.10 | 0.488 (0.459; 0.522) | 1.10 | 0.490 | >99% | RSABE |
| AUC | 1.10 | 0.416 (0.391; 0.444) | 1.10 | 0.425 | >99% | RSABE |
| Cmax | 1.08 | 0.696 (0.655; 0.744) | 1.10 | 0.700 | 96% | RSABE |

ABE = average bioequivalence; NMPA = National Medical Products Administration; Ref = reference; SDw = within-subject standard deviation; RSABE = Reference-scaled average bioequivalence approach.

Reference-scaled average bioequivalence approach was used according to NMPA guidance for bioequivalence study for highly variable drugs.
